# Supplementary material
Source: PubMed Central journal article supplement (PMC4593879)
Supplement: Supp_Figure1.pdf [file Supp_Figure1.pdf]

## Supplementary Data

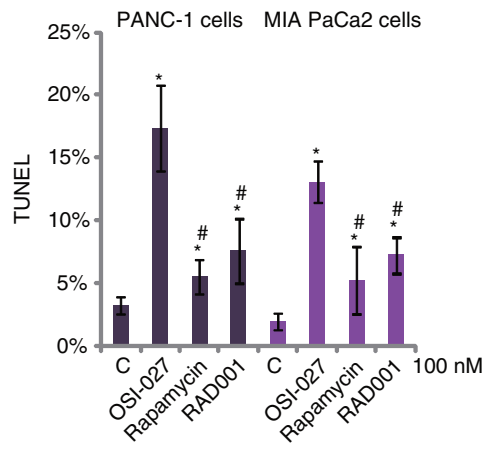

**SUPPLEMENTARY FIG. S1.** PANC-1 or MIA PaCa-2 pancreatic cancer cells were either left untreated (“C”), or stimulated with 100 nM of OSI-027, rapamycin, or RAD001 for 48 h, cell apoptosis was analyzed by terminal deoxynucleotidyl transferase dUTP nick end labeling staining assay. \* $p < 0.05$  versus “C” group. # $p < 0.05$  versus OSI-027 group.
