# Supplementary material
Source: PubMed Central journal article supplement (PMC4593879)
Supplement: Supp_Figure2.pdf [file Supp_Figure2.pdf]

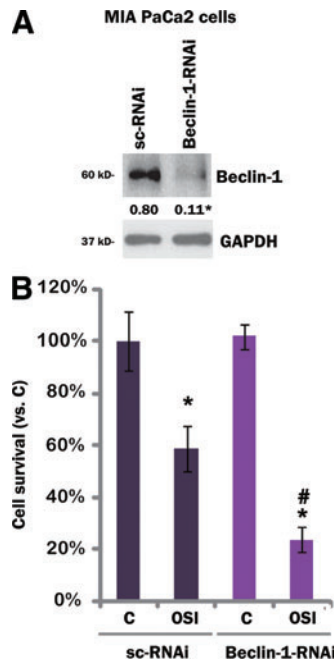

**SUPPLEMENTARY FIG. S2.** MIA PaCa-2 cells, transfected with scramble control siRNA (sc-RNAi) or Beclin-1 siRNA (100 nM each, 36 h), were either left untreated (“C”), or treated with OSI-027 (50 nM) for 72 h, expression of Beclin-1 and GAPDH was tested by western blots (**A**), cell survival was also tested (**B**). Data are expressed as mean  $\pm$  standard error, experiments were repeated five times.  $n = 5$  for each assay. \* $p < 0.05$  versus “C” group. # $p < 0.05$  versus “sc-RNAi” group.
