# Supplementary material
Source: PubMed Central journal article supplement (PMC4593879)
Supplement: Supp_Figure3.pdf [file Supp_Figure3.pdf]

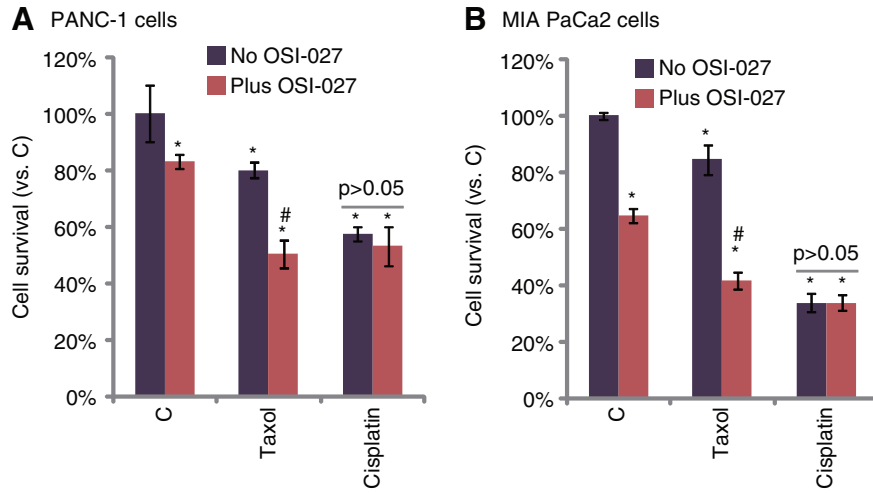

**SUPPLEMENTARY FIG. S3.** PANC-1 (A) or MIA PaCa-2 (B) cells were treated with OSI-027 (50 nM), or plus paclitaxel (Taxol, 10  $\mu$ M) and cisplatin (10  $\mu$ M) for 72 h, cell survival was tested by CellTiter-Glo assay. \* $p < 0.05$  versus “C” group. # $p < 0.05$  versus Taxol only group.
